# Supplementary material for: Development of Porous COP–Ceramic Composites for Application as Low-Relative- Permittivity, Low-Dielectric-Loss Substrates in Next-Generation Communication Systems
Source: Research Square preprint supplement (doi:10.21203/rs.3.rs-6798981/v1), 2025-06-17
Supplement: Supplementary file 1 [file cccf86c4dd1c1355b68af540.docx]

Development of Porous COP–Ceramic Composites for Application as Low-Relative-Permittivity, Low-Dielectric-Loss Substrates in Next-Generation Communication Systems

*Seisuke Ata＊,* *Takumi Ono, Yuto Kato*

Figure S1 shows each sample's relative permittivity and dielectric loss tangent measured using the resonance method. For each sample, measurements were conducted three times by reconstructing the resonant structure, and all data were presented. Table S1 lists the slope, intercept, and coefficient of determination obtained from linear regression of the measurement results. The results indicate that the coefficient of determination in the measured range exceeds approximately 0.8, demonstrating good accuracy. Figure S2 presents the XRD measurement results for aluminum nitride and aluminum oxide. For aluminum nitride, information on the crystal planes is included. Alpha-alumina was used in this study for aluminum oxide. In the case of alumina, hydrated compounds typically exhibit peaks at 7.8° and 15.6°; however, no such peaks were observed in this study. Therefore, it is considered that the influence of moisture is negligible for any of the fillers.

Table S1 Coefficients, intercepts, and coefficients of determination for approximate curves versus frequency for (a) relative permittivity (b) dielectric tangent for each sample. The original data are shown in Figure S1.

(a)

| Polymer | Filler | Filler(wt%) | Unfoamed=0  Foamed=1 | coefficient | intercept | coefficient of determination |
| --- | --- | --- | --- | --- | --- | --- |
| COP |  |  | 0 | -0.00062 | 2.26 | 0.83 |
| COP |  |  | 1 | 0.00032 | 1.60 | 0.85 |
| COP | AlN | 10 | 0 | 0.00044 | 2.43 | 0.84 |
| COP | AlN | 10 | 1 | 0.00013 | 1.83 | 0.85 |
| COP | AlN | 30 | 0 | -0.00009 | 2.61 | 0.83 |
| COP | AlN | 30 | 1 | 0.00011 | 1.93 | 0.85 |
| COP | Al2O3 | 10 | 0 | 0.00028 | 2.41 | 0.84 |
| COP | Al2O3 | 10 | 1 | 0.00000 | 1.56 | 0.85 |
| COP | Al2O3 | 30 | 0 | 0.00009 | 2.64 | 0.83 |
| COP | Al2O3 | 30 | 1 | 0.00010 | 1.75 | 0.85 |

(b)

| Polymer | Filler | Filler(wt%) | Unfoamed=0  Foamed=1 | coefficient | intercept | coefficient of determination |
| --- | --- | --- | --- | --- | --- | --- |
| COP |  |  | 0 | 0.00000 | 0.00153 | 0.87 |
| COP |  |  | 1 | 0.00000 | 0.00152 | 0.88 |
| COP | AlN | 10 | 0 | 0.00000 | 0.00163 | 0.83 |
| COP | AlN | 10 | 1 | 0.00000 | 0.00093 | 0.88 |
| COP | AlN | 30 | 0 | 0.00000 | 0.00283 | 0.79 |
| COP | AlN | 30 | 1 | -0.00001 | 0.00208 | 0.74 |
| COP | Al2O3 | 10 | 0 | 0.00000 | 0.00148 | 0.87 |
| COP | Al2O3 | 10 | 1 | 0.00001 | 0.00120 | 0.91 |
| COP | Al2O3 | 30 | 0 | 0.00000 | 0.00125 | 0.85 |
| COP | Al2O3 | 30 | 1 | 0.00000 | 0.00089 | 0.89 |

Figure S1. Relative permittivity (left) and dielectric loss (right) of samples. (a),(b) COP, (c)(d) COP_foamed, (e)(f) COP-AlN(10), (g)(h) COP-AlN (30), (i)(j) COP-AlN (10)_foamed, (k)(l) COP-AlN(30)_foamed, (m)(n) COP-Al2O3 (10), (o)(p) COP- Al2O3 (30), (q)(r) COP-Al2O3 (10)_foamed, (s)(t) COP- Al2O3 (30)_foamed.

(a)

(b)

FigureS2　XRD spectrum of (a) AlN (b) Al2O3.
